# Supplementary material for: Anti-Inflammatory, Antioxidant, and Wound-Healing Properties of Cyanobacteria from Thermal Mud of Balaruc-Les-Bains, France: A Multi-Approach Study
Source: Biomolecules. 2020 Dec 29;11(1):28. doi: 10.3390/biom11010028 (PMC7824682; doi:10.3390/biom11010028)
Supplement: Supplementary file 1 [file biomolecules-11-00028-s001.zip]

Archive with 5 entries (5 files):
- Demay et al._supp. data_Table S11.docx
- Figure S1_Consensus phylogenetic tree based on 16S rRNA gene sequences.pdf
- Figure S2. Molecular network_coloured by extraction.pdf
- Supp. data Table S1-S10 - BGCs description from the nine cyanobacteria.xlsx
- Supp. data Table S12-20 - BGCs from associated heterotrophic bacteria.xlsx
