# Supplementary material for: Anti-Inflammatory, Antioxidant, and Wound-Healing Properties of Cyanobacteria from Thermal Mud of Balaruc-Les-Bains, France: A Multi-Approach Study
Source: Biomolecules. 2020 Dec 29;11(1):28. doi: 10.3390/biom11010028 (PMC7824682; doi:10.3390/biom11010028)
Supplement: Supplementary file 1 [file biomolecules-11-00028-s001.zip › Supp. data Table S1-S10 - BGCs description from the nine cyanobacteria.xlsx]

## Sheet: Table S1
Table S1. Biosynthetic gene clusters from Planktothricoides raciborskii PMC 877.14
Cluster	Contig	From	To	Size (bp)	Cluster type	Automatic annotation	Similarity	Annotation status	Expert annotation
1	C877_NODE_2 - Region 1	2058429	2068638	10209	Bacteriocin	-	-	Unknown product but homolog BGC	-
2	C877_NODE_2 - Region 2	2476893	2523309	46416	NRPS	-	-	Unknown (no homolog)	-
3	C877_NODE_2 - Region 3	2668068	2709384	41316	NRPS-like	-	-	Unknown (no homolog)	-
4	C877_NODE_2 - Region 4	2782211	2824994	42783	NRPS-like	-	-	Unknown (no homolog)	-
5	C877_NODE_4 - Region 1	103736	126882	23146	Lanthipeptide	-	-	Unknown (no homolog)	-
6	C877_NODE_10 - Region 1	48223	58600	10377	Ectoine	-	-	Unknown (no homolog)	-
7	C877_NODE_15 - Region 1	37588	58517	20929	Terpene	S-layer glycan saccharide	0.13	Validated (manually curated)	Phytoene (carotenoids precursor)
								Confidence level
								Low
								Medium
								High
								Homologous with uncharacterized cluster

## Sheet: Table S2
Table S2. Biosynthetic gene clusters from Laspinema sp. PMC 878.14
Cluster	Contig	From	To	Size (bp)	Cluster type	Automatic annotation	Similarity	Annotation status	Expert annotation
1	C878_NODE_8 - Region 1	33145	85231	52086	NRPS	Cyanopeptin (cyanopeptolin-like)	0.75	Unknown product but homolog BGC	-
2	C878_NODE_8 - Region 2	127431	135191	7760	Bacteriocin	-	-	Unknown product but homolog BGC	-
3	C878_NODE_8 - Region 3	203805	214038	10233	Bacteriocin	-	-	Unknown product but homolog BGC	-
4	C878_NODE_8 - Region 4	560936	581862	20926	Terpene	-	-	Validated (manually curated)	Phytoene (carotenoids precursor)
5	C878_NODE_13 - Region 1	166470	209289	42819	NRPS-like	Anacyclamide	0.21	Unknown product but homolog BGC	-
6	C878_NODE_14 - Region 1	368689	401669	32980	RiPPS/Cyanobactin / bacteriocin / LAP	Tenucyclamide A/Tenuecyclamide C	0.85	Validated (manually curated)	Heterocyclin cyanobactin-like
7	C878_NODE_46 - Region 1	1	57418	57417	NRPS-T1PKS	Nostopeptolide	0.5	Unknown product but homolog BGC	-
								Confidence level
								Low
								Medium
								High
								Homologous with uncharacterized cluster

## Sheet: Table S3
Table S3. Biosynthetic gene clusters from Microcoleus vaginatus PMC 879.14
Cluster	Contig	From	To	Size (bp)	Cluster type	Automatic annotation	Similarity	Annotation status	Expert annotation
1	C879_NODE_4 - Region 1	1061051	1104041	42990	NRPS-like	Anabaenopeptin NZ857/nostoamide A	1	Unknown (no homolog)	-
2	C879_NODE_6 - Region 1	253113	274042	20929	Terpene	-	-	Validated (manually curated)	Phytoene (carotenoids precursor)
3	C879_NODE_6 - Region 2	855090	896958	41868	Resorcinol	Desotamide	0.09	Unknown product but homolog BGC	-
4	C879_NODE_6 - Region 3	961866	1040080	78214	NRPS	Puwainaphycins	0.4	Unknown product but homolog BGC	-
5	C879_NODE_6 - Region 4	1095604	1111897	16293	RiPPs	-	-	Unknown product but homolog BGC	-
6	C879_NODE_11 - Region 1	520507	577761	57254	NRPS	Micropeptin	0.25	Unknown (no homolog)	-
7	C879_NODE_23 - Region 1	1	78685	78684	transAT-PKS	Luminaolide	0.06	Unknown (no homolog)	-
								Confidence level
								Low
								Medium
								High
					resorcinol = phenol			Homologous with uncharacterized cluster

## Sheet: Table S4
Table S4. Biosynthetic gene clusters from Lyngbya martensiana PMC 880.14
Cluster	Contig	From	To	Size (bp)	Cluster type	Automatic annotation	Similarity	Annotation status	Expert annotation
1	C880_NODE_44 - Region 1	1	34099	34098	Terpene	Malleobactin (NRPS)	0.07	Validated (manually curated)	Phytoene (carotenoids precursor)
2	C880_NODE_80 - Region 1	89303	112713	23410	Bacteriocin/Lanthipeptide	-	-	Unknown product but homolog BGC	-
3	C880_NODE_106 - Region 1	45183	67488	22305	Lassopeptide	-	-	Unknown product but homolog BGC	-
4	C880_NODE_125 - Region 1	18697	28930	10233	Bacteriocin	-	-	Unknown product but homolog BGC	-
5	C880_NODE_127 - Region 1	32392	49251	16859	Siderophore	-	-	Validated (manually curated)	Schizokinen
6	C880_NODE_128 - Region 1	28176	77399	49223	NRPS	Cyanopeptin	0.75	Unknown product but homolog BGC	-
7	C880_NODE_142 - Region 1	52908	73837	20929	Terpene	Trichamide (cyanobactin)	0.18	Validated (manually curated)	Phytoene (carotenoids precursor)
8	C880_NODE_231 - Region 1	37446	47679	10233	Bacteriocin	-	-	Unknown product but homolog BGC	-
9	C880_NODE_1578	1	8029	8028	Bacteriocin	-	-	Unknown (no homolog)	-
								Confidence level
								Low
								Medium
								High
								Homologous with uncharacterized cluster

## Sheet: Table S5
Table S5. Biosynthetic gene clusters from Nostoc sp. PMC 881.14
Cluster	Contig	From	To	Size (bp)	Cluster type	Automatic annotation	Similarity	Annotation status	Expert annotation
1	C881_NODE_77 - Region 1	1	88771	88770	NRPS/T1PKS/Bacteriocin/lanthipeptide	Nostophycin	0.27	Unknown product but homolog BGC	-
2	C881_NODE_132 - Region 1	24582	45514	20932	Terpene	-	-	Validated (manually curated)	Phytoene (carotenoids precursor)
3	C881_NODE_151 - Region 1	3676	14392	10716	Bacteriocin	-	-	Unknown (no homolog)	-
4	C881_NODE_268 - Region 1	1	29757	29756	T1PKS	-	-	Unknown (no homolog)	-
5	C881_NODE_275 - Region 1	8666	18956	10290	Bacteriocin	-	-	Unknown (no homolog)	-
6	C881_NODE_281 - Region 1	1	37735	37734	NRPS/T1PKS	Chondrochloren	0.33	Unknown product but homolog BGC	-
7	C881_NODE_300 - Region 1	7522	18376	10854	Bacteriocin	-	-	Unknown product but homolog BGC	-
8	C881_NODE_328 - Region 1	1	33447	33446	T1PKS/hglE-KS	Heterocyst glycolipids	1	Validated	Heterocyst glycolipids
9	C881_NODE_379 - Region 1	1	28956	28955	NRPS	Anabaenopeptin	0.43	Unknown (no homolog)	-
10	C881_NODE_394 - Region 1	12176	27485	15309	Cyanobactin	Piriyclamide	0.25	Uncertained	Cyanobactin-like
11	C881_NODE_396 - Region 1	1	27204	27203	NRPS	Nostophycin	0.18	Unknown (no homolog)	-
12	C881_NODE_427 - Region 1	1	25425	25424	NRPS	-	-	Unknown (no homolog)	-
13	C881_NODE_522 - Region 1	3473	21216	17743	Terpene	-	-	Validated (manually curated)	Phytoene (carotenoids precursor)
14	C881_NODE_537 - Region 1	1	17625	17624	Terpene	-	-	Unknown product but homolog BGC	-
15	C881_NODE_574 - Region 1	10827	19081	8254	Bacteriocin	-	-	Unknown (partial)	-
16	C881_NODE_651 - Region 1	1	16581	16580	Phosphonate	-	-	Unknown (partial)	-
17	C881_NODE_793 - Region 1	1	12472	12471	Bacteriocin (microviridin?)	6,6'-oxybis(2,4-dibromophenol)	0.21	Unknown (no homolog)	-
18	C881_NODE_970 - Region 1	1	8621	8620	Lanthipeptide	-	-	Unknown (partial)	-
19	C881_NODE_1168 - Region 1	1	5446	5445	Terpene	-	-	Unknown (partial)	-
20	C881_NODE_1419 - Region 1	1	3049	3048	Indole	-	-	Unknown (partial)	-
					hglE-KS : heterocyst glycolipid synthase-like PKS
								Low
								Medium
								High
								Homologous with uncharacterized cluster

## Sheet: Table S6
Table S6. Biosynthetic gene clusters from Aliinostoc sp. PMC 882.14
Cluster	Contig	From	To	Size (bp)	Cluster type	Automatic annotation	Similarity	Annotation status	Expert annotation
1	C882_NODE_3 - Region 1	15640	37498	21858	NRPS-like	Shinorine	1	Validated	Shinorine
2	C882_NODE_3 - Region 2	245505	310129	64624	NRPS/T1PKS/microviridin	Puwainaphycins	0.6	Validated (manually curated)	Microginin
3	C882_NODE_3 - Region 3	640730	684201	43471	NRPS-like	-	-	Unknown (no homolog)	-
4	C882_NODE_3 - Region 4	1403211	1493957	90746	NRPS/T1PKS	Hapalosin	0.4	Unknown (no homolog)	-
5	C882_NODE_3 - Region 5	1568034	1637956	69922	NRPS	Cyanopeptin	0.75	Unknown (no homolog)	-
6	C882_NODE_7 - Region 1	82074	126088	44014	T1PKS	Amycomicin	0.62	Validated (manually curated)	Amycomycin-like
7	C882_NODE_7 - Region 2	166759	210645	43886	NRPS	Micropeptin	0.62	Unknown (no homolog)	-
8	C882_NODE_7 - Region 3	264995	311442	46447	T1PKS/bacteriocin	Jamaicamide	0.15	Unknown (no homolog)	-
9	C882_NODE_7 - Region 4	404145	473658	69513	NRPS	Nostopeptolide	0.37	Unknown (no homolog)	-
10	C882_NODE_7 - Region 5	560196	581026	20830	Terpene	-	-	Validated (manually curated)	Phytoene (carotenoids precursor)
11	C882_NODE_9 - Region 1	145215	197610	52395	T1PKS/hglE-KS	Heterocyst glycolipids	0.85	Validated	Heterocyst glycolipids
12	C882_NODE_9 - Region 2	335457	345690	10233	Bacteriocin	-	-	Unknown product but homolog BGC	-
13	C882_NODE_9 - Region 3	364924	406075	41151	Ladderane	-	-	Unknown product but homolog BGC	-
14	C882_NODE_12 - Region 1	482095	502947	20852	Microviridin (bacteriocin)	Microviridin K	0.62	Validated	Microviridin
15	C882_NODE_13 - Region 1	45863	138173	92310	NRPS/T1PKS	Nostophycin	0.27	Unknown product but homolog BGC	-
16	C882_NODE_14 - Region 1	225206	244913	19707	Terpene	6,6'-oxybis(2,4-dibromophenol) / bartolosides	0.21	Unknown product but homolog BGC	-
17	C882_NODE_14 - Region 2	305160	326092	20932	Terpene	-	-	Validated (manually curated)	Phytoene (carotenoids precursor)
18	C882_NODE_15 - Region 1	193638	269628	75990	NRPS	Puwainaphycins	0.4	Unknown product but homolog BGC	-
19	C882_NODE_15 - Region 2	270364	315220	44856	T1PKS	Carbamidocyclophane	0.3	Uncertained	Cylindrocyclophane-like
20	C882_NODE_16 - Region 1	202309	253885	51576	NRPS/betalactone	-	-	Unknown (no homolog)	-
21	C882_NODE_18 - Region 1	65575	76344	10769	Bacteriocin	Welwitindolinone	0.06	Unknown product but homolog BGC	-
					antiSMASH betalactone = betalactone containing protease inhibitor			Confidence level				None: no significant homology with referenced clusters
								Low				Not relevant: certain homology detected for some gene clusters with no sense regarding to cluster organisation	Not relevant: certain homology detected for some genes with no sense regarding to cluster organisation
								Medium
								High
								Homologous with uncharacterized cluster

## Sheet: Table S7
Table S7. Biosynthetic gene clusters from Leptolyngbya boryana PMC 883.14
Cluster	Contig	From	To	Size (bp)	Cluster type	Automatic annotation	Similarity	Annotation status	Expert annotation
1	C883_NODE_1 - Region 1	83669	104948	21279	Terpene	-	-	Validated (manually curated)	Phytoene (carotenoids precursor)
2	C883_NODE_1 - Region 2	112313	156329	44016	NRPS	-	-	Unknown product but homolog BGC	-
3	C883_NODE_1 - Region 3	248779	253596	4817	Bacteriocin	-	-	Unknown product but homolog BGC	-
4	C883_NODE_1 - Region 4	1408656	1418889	10233	Bacteriocin	-	-	Unknown product but homolog BGC	-
5	C883_NODE_1 - Region 5	1619886	1638156	18270	Terpene	-	-	Validated (manually curated)	Phytoene (carotenoids precursor)
6	C883_NODE_1 - Region 6	1905423	1929318	23895	Lassopeptide	-	-	Unknown product but homolog BGC	-
7	C883_NODE_1 - Region 7	3038383	3059201	20818	Terpene	-	-	Validated (manually curated)	Phytoene (carotenoids precursor)
8	C883_NODE_2 - Region 1	66511	86277	19766	Terpene	-	-	Validated (manually curated)	Phytoene (carotenoids precursor)
9	C883_NODE_2 - Region 2	253355	292807	39452	Bacteriocin/lanthipeptide	-	-	Unknown (no homolog)	-
10	C883_NODE_2 - Region 3	790251	830822	40571	NRPS-like	Heme D1	0.11	Unknown product but homolog BGC	-
11	C883_NODE_2 - Region 4	969702	1011851	42149	NRPS	-	-	Unknown product but homolog BGC	-
12	C883_NODE_2 - Region 5	1341612	1362619	21007	Terpene	-	-	Validated (manually curated)	Phytoene (carotenoids precursor)
13	C883_NODE_2 - Region 6	1988527	2031662	43135	NRPS-like	-	-	Unknown product but homolog BGC	-
14	C883_NODE_2 - Region 7	2588904	2642774	53870	Bacteriocin/NRPS	Cyanopeptin (NRPS)	0.75	Unknown product but homolog BGC	-
15	C883_NODE_2 - Region 8	2950929	2995203	44274	NRPS	-	-	Unknown (no homolog)	-
16	C883_NODE_16 - Region 1	128363	151761	23398	Lanthipeptide/bacteriocin	-	-	Unknown (no homolog)	-
								Confidence level
								Low
								Medium
								High
								Homologous with uncharacterized cluster

## Sheet: Table S8
Table S8. Biosynthetic gene clusters from Calothrix sp. PMC 884.14
Cluster	Contig	From	To	Size (bp)	Cluster type	Automatic annotation	Similarity	Annotation status	Expert annotation
1	C884_NODE_1 - Region 1	81420	110742	29322	Lassopeptide	-	-	Unknown product but homolog BGC	-
2	C884_NODE_1 - Region 2	373531	383734	10203	Bacteriocin	-	-	Unknown product but homolog BGC	-
3	C884_NODE_1 - Region 3	947694	970253	22559	Terpene	Malleobactin	0.07	Validated (manually curated)	Phytoene (carotenoids precursor)
4	C884_NODE_1 - Region 4	1058565	1087796	29231	LAP/cyanobactin	Trichamide	0.45	Validated (manually curated)	Cyanobactin-like
5	C884_NODE_1 - Region 5	1430708	1486356	55648	oligosaccharide/terpene	-	-	Unknown product but homolog BGC	-
6	C884_NODE_1 - Region 6	1658997	1701884	42887	NRPS	Hexone-palythine-serine/hexone-shinorine	0.57	Validated	MAAs
7	C884_NODE_1 - Region 7	2383265	2404230	20965	Terpene	-	-	Validated (manually curated)	Phytoene (carotenoids precursor)
8	C884_NODE_1 - Region 8	2469690	2489983	20293	Microviridin	-	-	Unknown (no homolog)	-
9	C884_NODE_1 - Region 9	3026023	3070112	44089	T1PKS	Carbamidocyclophane	0.38	Validated	Cylindrocyclophane
10	C884_NODE_1 - Region 10	3127148	3262787	135639	NRPS/T1PKS	Nostopeptolide	0.5	Unknown (no homolog)	-
11	C884_NODE_2 - Region 4	2133166	2176396	43230	NRPS-like	Cylindrocyclophane	0.12	Unknown product but homolog BGC	-
12	C884_NODE_2 - Region 5	2618846	2642049	23203	Lanthipeptide/bacteriocin	-	-	Unknown product but homolog BGC	-
13	C884_NODE_3 - Region 1	340357	360905	20548	Phenazine	-	-	Unknown product but homolog BGC	-
14	C884_NODE_3 - Region 2	911043	931963	20920	Microviridin	Microviridin K	0.25	Unknown product but homolog BGC	-
15	C884_NODE_3 - Region 3	1317677	1340549	22872	Lassopeptide	Nostophycin	0.36	Unknown product but homolog BGC	-
16	C884_NODE_3 - Region 4	1513993	1524304	10311	Bacteriocin	-	-	Unknown product but homolog BGC	-
17	C884_NODE_3 - Region 5	1537496	1579958	42462	NRPS-like	-	-	Unknown (no homolog)	-
18	C884_NODE_5 - Region 1	285211	326362	41151	Ladderane	-	-	Unknown product but homolog BGC	-
19	C884_NODE_5 - Region 2	813707	837030	23323	Indole	Staurosporine	0.13	Unknown product but homolog BGC	-
20	C884_NODE_5 - Region 3	863596	885716	22120	Terpene	-	-	Validated (manually curated)	Phytoene (carotenoids precursor)
21	C884_NODE_7 - Region 1	181332	261872	80540	NRPS-like/hglE-KS/T1PKS	Heterocyst glycolipids	0.85	Validated	Heterocyst glycolipids
22	C884_NODE_7 - Region 2	290786	333878	43092	NRPS-like	Nocuolin A	0.19	Unknown product but homolog BGC	-
23	C884_NODE_11 - Region 1	2126	12251	10125	Bacteriocin	-	-	Unknown (no homolog)	-
24	C884_NODE_18 - Region 1	259581	299134	39553	NRPS-like	Anabaenopeptin NZ857/nostoamide A	1	Unknown product but homolog BGC	-
25	C884_NODE_22 - Region 1	175498	195959	20461	Phenazine	X	X	Unknown product but homolog BGC	-
26	C884_NODE_22 - Region 2	242813	275695	32882	NRPS	X	X	Unknown (no homolog)	-
27	C884_NODE_28 - Region 1	89411	153168	63757	T1PKS/NRPS	Jamaicamide	0.23	Unknown (no homolog)	-
								Confidence level
								Low
								Medium
								High
								Homologous with uncharacterized cluster

## Sheet: Table S9
Table S9. Biosynthetic gene clusters from Pseudo-chroococcus couteii PMC 885.14
Cluster	Contig	From	To	Size (bp)	Cluster type	Automatic annotation	Similarity	Annotation status	Expert annotation
1	C885_NODE_15 - Region 1	262433	369084	106651	NRPS/T1PKS	Nostophycin	0.27	Unknown product but homolog BGC	-
2	C885_NODE_26 - Region 1	108837	171757	62920	NRPS-like/T1PKS	Puwainaphycins	0.3	Unknown (no homolog)	-
3	C885_NODE_32 - Region 1	93483	143228	49745	NRPS	-	-	Unknown (no homolog)	-
4	C885_NODE_43 - Region 1	115568	136380	20812	Terpene	-	-	Validated (manually curated)	Phytoene (carotenoids precursor)
5	C885_NODE_44 - Region 1	114952	136889	21937	Terpene	-	-	Uncertained	Terpene derivative
6	C885_NODE_60 - Region 1	1	81263	81262	NRPS/LAP/thiopeptide/bacteriocin	Cyanopeptolin (NRPS)	0.57	Unknown (no homolog)	-
7	C885_NODE_62 - Region 1	76055	90934	14879	Terpene	-	-	Validated (manually curated)	Phytoene (carotenoids precursor)
8	C885_NODE_73 - Region 1	1	13578	13577	Lanthipeptide	-	-	Unknown (no homolog)	-
9	C885_NODE_102 - Region 1	10331	41567	31236	Ladderane	-	-	Unknown (no homolog)	-
10	C885_NODE_213 - Region 1	1	6434	6433	NRPS	-	-	Unknown (no homolog)	-
								Confidence level
								Low
								Medium
								High
								Homologous with uncharacterized cluster

## Sheet: Table S10
Table S10. Biosynthetic genes for pigment production
		C-phycocyanin						allo-phycocyanin					phycoerythrin				Scytonemin																Carotenoids
		alpha chain	beta chain	linker polypeptide (32,1 kDa), associated	linker polypeptide (8,9 kDa), associated	Phycobilisome 30.8 kDa linker polypeptide, phycocyanin-associated	Phycobilisome 39 kDa linker polypeptide, phycocyanin-associated	alpha chain	beta chain	Phycobilisome 7.8 kDa linker polypeptide, allophycocyanin-associated	Allophycocyanin subunit alpha-B	subunit beta-18	alpha chain	beta chain	phycobilisome 31,8 kDa, linker protein, phycroerythrin associated	phycobilisome 27,9 kDa, linker protein, phycroerythrin associated																	Geranylgeranyl diphosphate synthase / geranylgeranyl pyrophosphate synthase	Phytoene synthase	15-cis-phytoene desaturase / phytoene desaturase	Beta-carotene desaturase / zeta-carotene desaturae	cis-carotene isomerase	Lycopene cyclase	Lycopene cyclase	1',2'-hydratase	2'-O-glycosyltransferase	3',4'-desaturase	GDP-fucose synthase	beta-carotene hydrolase	beta-carotene ketolase	2,2'-beta-hydroxylase	Lycopene cyclase	beta-carotene ketolase
Species	Strain number	cpcA	cpcB	cpcC	cpcD	cpcH	cpcI	apcA	apcB	apcC	apcD	apcF	cpeA	cpeB	cpeC	cpeD	scyA	scyB	scyC	scyD	scyE	ScyF	tyrA	frnE	aroB	trpE	trpC	trpA	tyrP1	trpB	trpD	aroG	crtE	crtB	crtP	crtQ	crtH	cruA	cruP	cruF	cruG	crtD	wcaG	crtR	crtO	crtG	crtL	crtW
Planktothricoides raciborskii	PMC 877.14	++	++	+	+	-	-	+	+	+	-	+	+	+	++	+	-	-	-	-	-	-	-	-	-	-	-	-	-	-	-	-	+	+	+	+	+	+	+	+	+	+	+	+	-	-	-	+/-
Laspinema sp.	PMC 878.14	+	+	+	-	-	-	+	+	+	-	+	-	-	-	-	-	-	-	-	-	-	-	-	-	-	-	-	-	-	-	-	+	+	+	+	+	+	+	+	+	+	+	+	+	+/-	+/-	+/-
Microcoleus vaginatus	PMC 879.14	+	+	+	+	+	-	+	+	+	-	-	-	-	-	-	-	-	-	-	-	-	-	-	-	-	-	-	-	-	-	+	+	+	+	+	+	+	+	+	+	+	+	+	+	-	-	+/-
Lyngbya martensiana	PMC 880.14	+	+	+	+	-	-	+	+	+	+	+	-	-	-	-	-	-	-	-	-	-	-	-	-	-	-	-	-	-	-	-	+	+	+	+	+	+	+	+	+	+	+	+	+	+/-	-	+/-
Nostoc sp.	PMC 881.14	+	+	+	-	+	-	+	+	+	+	+	+	+	+	++	++	+	+	+++	+++	+	+	+	+	+	+	+	+	+	+	+	+	+	+	+	+	+	+	+++	+	+	+	+	+	-	-	+
Alinostoc sp.	PMC 882.14	+	+	+	+	-	-	++	+	+	+	+	-	-	-	-	+	+	+	++	++	+	+	+	+	++	++	+	+	+	+	+	+	+	+	+	+	+	+	+	+	+	+	+	+	+/-	-	+
Leptolyngbya boryana	PMC 883.14	++++	++++	+	+	+	+	++	+	+	+	-	-	-	-	-	-	-	-	-	-	-	-	-	-	-	-	-	-	-	-	-	+	++	+	+	+	+	+	+	+	+	+	+	++	+/-	-	++
Calothrix sp.	PMC 884.14	++	++	+	+	+	-	++	++	+	++	-	+	+	+	+	+	+	+	+++	+++	+	+	+	+	++	++	++	+	++	+	++	+	+	+	+	+	+	+	+	+	+	+	+	++	+/-	-	++++
Pseudo-chroococcus couteii	PMC 885.14	+	+	+	-	-	-	+	+	+	+	+	+	+	+	+	-	-	-	+	+	-	-	-	-	-	-	-	-	-	-	-	+	+	+	+	+	+	+	+	+	+++	+	+	+	-	-	+/-
		+	presence of one gene copy																																											+/-	presence of genes with an identity under 50%, but annotated with the same fonction
		++	presence of two gene copies
		+++	presence of three gene copies
		++++	presence of four gene copies
		-	absence of gene copy
		Scytonemin
Species	Strain number	scyA	scyB	scyC	scyD	scyE	ScyF	tyrA	frnE	aroB	trpE	trpC	trpA	tyrP1	trpB	trpD	aroG
Planktothricoides raciborskii	PMC 877.14	-	-	-	-	-	-	-	-	-	-	-	-	-	-	-	-
Laspinema sp.	PMC 878.14	-	-	-	-	-	-	-	-	-	-	-	-	-	-	-	-
Microcoleus vaginatus	PMC 879.14	-	-	-	-	-	-	-	-	-	-	-	-	-	-	-	+
Lyngbya martensiana	PMC 880.14	-	-	-	-	-	-	-	-	-	-	-	-	-	-	-	-
Nostoc sp.	PMC 881.14	++	+	+	+++	+++	+	+	+	+	+	+	+	+	+	+	+
Alinostoc sp.	PMC 882.14	+	+	+	++	++	+	+	+	+	++	++	+	+	+	+	+
Leptolyngbya boryana	PMC 883.14	-	-	-	-	-	-	-	-	-	-	-	-	-	-	-	-
Calothrix sp.	PMC 884.14	+	+	+	+++	+++	+	+	+	+	++	++	++	+	++	+	++
Pseudo-chroococcus couteii	PMC 885.14	-	-	-	+	+	-	-	-	-	-	-	-	-	-	-	-
		Carotenoids
		Geranylgeranyl diphosphate synthase / geranylgeranyl pyrophosphate synthase	Phytoene synthase	15-cis-phytoene desaturase / phytoene desaturase	Beta-carotene desaturase / zeta-carotene desaturae	cis-carotene isomerase	Lycopene cyclase	Lycopene cyclase	1',2'-hydratase	2'-O-glycosyltransferase	3',4'-desaturase	GDP-fucose synthase	beta-carotene hydrolase	beta-carotene ketolase	2,2'-beta-hydroxylase	Lycopene cyclase	beta-carotene ketolase
Species	Strain number	crtE	crtB	crtP	crtQ	crtH	cruA	cruP	cruF	cruG	crtD	wcaG	crtR	crtO	crtG	crtL	crtW
Planktothricoides raciborskii	PMC 877.14	+	+	+	+	+	+	+	+	+	+	+	+	-	-	-	+/-
Laspinema sp.	PMC 878.14	+	+	+	+	+	+	+	+	+	+	+	+	+	+/-	+/-	+/-
Microcoleus vaginatus	PMC 879.14	+	+	+	+	+	+	+	+	+	+	+	+	+	-	-	+/-
Lyngbya martensiana	PMC 880.14	+	+	+	+	+	+	+	+	+	+	+	+	+	+/-	-	+/-
Nostoc sp.	PMC 881.14	+	+	+	+	+	+	+	+++	+	+	+	+	+	-	-	+
Alinostoc sp.	PMC 882.14	+	+	+	+	+	+	+	+	+	+	+	+	+	+/-	-	+
Leptolyngbya boryana	PMC 883.14	+	++	+	+	+	+	+	+	+	+	+	+	++	+/-	-	++
Calothrix sp.	PMC 884.14	+	+	+	+	+	+	+	+	+	+	+	+	++	+/-	-	++++
Pseudo-chroococcus couteii	PMC 885.14	+	+	+	+	+	+	+	+	+	+++	+	+	+	-	-	+/-
