# Supplementary material for: Anti-Inflammatory, Antioxidant, and Wound-Healing Properties of Cyanobacteria from Thermal Mud of Balaruc-Les-Bains, France: A Multi-Approach Study
Source: Biomolecules. 2020 Dec 29;11(1):28. doi: 10.3390/biom11010028 (PMC7824682; doi:10.3390/biom11010028)
Supplement: Supplementary file 1 [file biomolecules-11-00028-s001.zip › Supp. data Table S12-20 - BGCs from associated heterotrophic bacteria.xlsx]

## Sheet: Table S12
Strain_Phylum	Nb_seq	Total_size (bp)	> 2Mb
C877__Bacteroidetes	8	2940501	3 Mb
P. raciborskii PMC 877.14	15	7391557	7 Mb
C877__Proteobacteria	7	3625685	4 Mb
Region	Cluster type	From	To	Automatic annotation	Similarity
C877__Bacteroidetes
Region 1.1	terpene	375,588	393,393	carotenoid	0.28
Region 1.2	terpene	1,478,242	1,499,378
C877__Proteobacteria
Region 1.1	T3PKS	642,994	684,064	Stilbene synthase
Region 1.2	betalactone	1,038,946	1,061,957
Region 1.3	terpene	1,328,349	1,352,625	zeaxanthin	0.66
Region 1.4	bacteriocin	3,397,096	3,407,962

## Sheet: Table S13
Strain_Phylum	Nb_seq	Total_size (bp)	> 2Mb
Laspinema sp. PMC 878.14	69	7336742	7 Mb
C878__Proteobacteria	45	12013276	12 Mb
Region	Cluster type	From	To	Automatic annotation	Similarity
C878__Proteobacteria
Region 2.1	bacteriocin	172,817	182,664	N-tetradecanoyl tyrosine	0.06
Region 2.2	bacteriocin	889,564	900,409
Region 3.1	terpene	1,491,126	1,515,402	zeaxanthin	0.66
Region 4.1	T3PKS	827,476	868,507
Region 5.1	bacteriocin	493,475	504,341
Region 7.1	T3PKS	344,592	385,671
Region 8.1	terpene	324,954	345,886	zeaxanthin	0.66
Region 9.1	terpene	168,596	189,771
Region 11.1	betalactone	94,369	117,380
Region 17.1	terpene	40,031	61,775
Region 17.2	NAGGN	117,470	132,105
Region 20.1	terpene	31,184	52,260	carotenoid	1

## Sheet: Table S14
Strain_Phylum	Nb_seq	Total_size (bp)	> 2Mb
C879__Bacteroidetes	15	1758668	2 Mb
M. vaginatus PMC 879.14	34	6900942	8 Mb
C879__Proteobacteria	11	10840780	11 Mb
Region	Cluster type	From	To	Automatic annotation	Similarity
C879__Bacteroidetes
Region 1.1	terpene	362,114	383,250	bacillomycin D	0.2
C879__Proteobacteria
Region 1.1	lassopeptide	59,674	82,047
Region 1.2	resorcinol	877,084	918,226
Region 1.3	terpene	2,262,269	2,285,875	carotenoid	0.5
Region 2.1	NRPS	605,873	649,721	quinolobactin	0.13
Region 2.2	acyl_amino_acids,bacteriocin	737,440	803,530
Region 2.3	bacteriocin	1,021,910	1,033,529
Region 2.4	hserlactone	1,127,881	1,148,627
Region 2.5	terpene	1,515,604	1,536,849
Region 2.6	terpene	1,616,641	1,637,678	carotenoid	1
Region 3.1	acyl_amino_acids	132,511	193,269
Region 4.1	terpene	960,247	984,488	carotenoid	0.25
Region 7.1	bacteriocin	30,208	40,167
Region 7.2	bacteriocin	407,492	418,376

## Sheet: Table S15
Strain_Phylum	Nb_seq	Total_size (bp)	> 2Mb
C880__Bacteroidetes	1803	14271057	14 Mb
L.martensiana PMC 880.14	132	6444104	6 Mb
C880__Gemmatimonadetes	25	4542236	5 Mb
C880__not_classified	1059	7386760	8 Mb
C880__Planctomycetes	216	6159044	6 Mb
C880__Proteobacteria	2151	21578483	21 Mb
C880__Verrucomicrobia	80	12198660	12 Mb
Region	Cluster type	From	To	Automatic annotation	Similarity
C880__Bacteroidetes
Region 1.1	T3PKS	293,918	334,997
Region 1.2	terpene	339,573	360,415	carotenoid	1
Region 6.1	terpene	2,827	24,395
Region 175.1	T3PKS	1	13,353
Region 230.1	terpene	1	10,860	carotenoid	0.42
Region 355.1	terpene	1	7,739	carotenoid	0.42
Region 861.1	T3PKS	1	3,334
C880__Gemmatimonadetes
Region 5.1	NRPS-like	187,071	230,421
Region 7.1	terpene	193,343	214,425
Region 15.1	terpene	1	20,921
C880__not_classified
Region 29.1	terpene	1	13,674
Region 35.1	terpene	24,420	35,162
Region 169.1	terpene	1	12,890
Region 257.1	bacteriocin	1	7,548
Region 353.1	terpene	1	4,883
Region 483.1	bacteriocin	1	3,127
Region 687.1	terpene	1	1,905	carotenoid	1
Region 729.1	bacteriocin	1	1,754
C880__Planctomycetes
Region 2.1	T1PKS	31,216	77,608
Region 20.1	T3PKS	1	28,411
Region 39.1	NRPS-like	6,091	45,069
Region 41.1	terpene	7,010	28,959
Region 73.1	NRPS-like	1	25,289
Region 119.1	terpene	1	12,278
C880__Proteobacteria
Region 1.1	NAGGN	713,809	728,444
Region 1.2	terpene	763,228	784,972
Region 2.1	arylpolyene	394,378	435,577	APE Vf	0.1
Region 12.1	bacteriocin	1	8,037
Region 15.1	bacteriocin	85,427	96,302	N-tetradecanoyl tyrosine	0.06
Region 17.1	terpene	66,118	87,110	(2R,3S,3'S)-2-hydroxyastaxanthin	0.33
Region 55.1	terpene	32,030	49,799
Region 70.1	terpene	7,126	30,699	carotenoid	0.41
Region 71.1	bacteriocin	36,514	42,106
Region 76.1	terpene	29,535	40,909
Region 105.1	terpene	5,249	28,846	carotenoid	0.83
Region 128.1	NRPS	1	29,985
Region 216.1	arylpolyene	1	22,177
Region 218.1	TfuA-related	3,735	22,140
Region 241.1	hserlactone	1	11,963
Region 437.1	hserlactone	1	12,908
Region 440.1	hserlactone	1	10,780
Region 525.1	NRPS-like	1	10,675
Region 542.1	betalactone	1	10,217
Region 548.1	hserlactone	1	10,071	gentamicin	0.05
Region 592.1	bacteriocin	1	6,019
Region 706.1	T1PKS	1	7,029
Region 779.1	NRPS-like	1	6,096
Region 870.1	lassopeptide	1	5,070
Region 926.1	terpene	1	4,511
Region 952.1	lassopeptide	1	4,300
Region 1137.1	terpene	1	3,149
Region 1442.1	bacteriocin	1	2,095
Region 1578.1	hserlactone	1	1,788
Region 1612.1	T3PKS	1	1,730
C880__Verrucomicrobia
Region 2.1	NRPS-like	116,797	158,402
Region 2.2	NRPS	224,523	269,115
Region 4.1	terpene	553,632	574,498
Region 5.1	terpene	227,102	248,130
Region 7.1	ladderane	110,407	151,651
Region 7.2	NRPS,T1PKS	259,992	337,273
Region 13.1	NRPS,T1PKS,terpene	265,464	318,599	hapalosin	0.4
Region 16.1	terpene	201,844	226,655
Region 18.1	T3PKS	214,687	255,856
Region 20.1	terpene	149,329	170,411
Region 26.1	NRPS	86,648	130,541	alkylpyrone-407 / alkylpyrone-393	0.04
Region 27.1	NRPS	32,628	76,076
Region 31.1	T1PKS	21,768	69,462
Region 37.1	terpene	74,137	95,882
Region 47.1	T3PKS	12,087	53,277

## Sheet: Table S16
Strain_Phylum	Nb_seq	Total_size (bp)	> 2Mb
Nostoc sp. PMC 881.14	648	7938353	8 Mb
C881__not_classified	401	5727335	6 Mb
C881__Proteobacteria	1146	27227936	27 Mb
Region	Cluster type	From	To	Automatic annotation	Similarity
C881__not_classified
Region 1.1	terpene	3,440	24,639	carotenoid	1
Region 3.1	hserlactone	25,338	46,168
Region 6.1	terpene	53,307	75,001
Region 13.1	terpene	12,844	31,992	carotenoid	0.5
Region 13.2	terpene	82,338	96,558
Region 35.1	T3PKS	15,650	43,374	alkylresorcinol	1
Region 48.1	terpene	1	18,017	carotenoid	1
Region 53.1	acyl_amino_acids,hserlactone	1	24,545	N-acyl alanine	1
C881__Proteobacteria
Region 1.1	indole	493,985	515,277
Region 3.1	bacteriocin	379,145	389,993
Region 4.1	bacteriocin	319,562	330,437	N-tetradecanoyl tyrosine	0.06
Region 8.1	T3PKS	123,988	165,082
Region 8.2	lassopeptide,hserlactone	237,236	268,428	gellan polysaccharide	0.07
Region 9.1	NRPS-like,T1PKS,NRPS	138,763	190,304
Region 11.1	bacteriocin	98,030	108,233
Region 14.1	betalactone	48,038	78,075
Region 15.1	betalactone	89,411	117,657
Region 21.1	terpene	80,393	101,568
Region 24.1	hserlactone	99,764	120,381
Region 31.1	terpene	1	17,854
Region 48.1	arylpolyene	86,390	107,690	APE Vf	0.15
Region 63.1	bacteriocin	60,916	71,743
Region 71.1	hserlactone	48,161	68,766
Region 72.1	terpene	70,521	81,478
Region 74.1	arylpolyene	56,279	80,794
Region 86.1	T3PKS	38,925	75,251
Region 102.1	T3PKS	23,940	64,183
Region 126.1	hserlactone	4,857	25,534
Region 127.1	NRPS-like,T1PKS	11,928	53,614
Region 153.1	terpene	1	15,121
Region 159.1	NRPS,T1PKS	1	34,712	capsular polysaccharide	0.03
Region 172.1	betalactone	4,591	36,403
Region 177.1	indole	7,504	29,399
Region 206.1	betalactone	3,708	30,194
Region 265.1	bacteriocin	16,007	26,596
Region 303.1	NAGGN	4,891	19,669
Region 315.1	terpene	2,215	21,746
Region 418.1	TfuA-related	1	15,131	kanamycin	0.07
Region 428.1	terpene	1	14,403
Region 460.1	NRPS-like	1	12,926
Region 574.1	terpene	1	8,260
Region 595.1	terpene	1	7,749
Region 756.1	terpene	1	3,799
Region 781.1	NRPS-like	1	3,473

## Sheet: Table S17
Strain_Phylum	Nb_seq	Total_size (bp)	> 2Mb
C882__Armatimonadetes	5	7360037	7 Mb
Aliinostoc sp. PMC 882.14	46	8132153	8 Mb
C882__Proteobacteria	41	9857661	10 Mb
C882__Verrucomicrobia	2	8907
Region	Cluster type	From	To	Automatic annotation	Similarity
C882__Armatimonadetes
Region 1.1	terpene	3,473,218	3,494,117
Region 2.1	terpene	520,350	541,288
C882__Proteobacteria
Region 1.1	T3PKS	1,084,056	1,125,144
Region 1.2	terpene	2,132,398	2,156,643	carotenoid	0.4
Region 2.1	hserlactone,lassopeptide	748,957	779,728
Region 3.1	bacteriocin	83,075	93,911
Region 4.1	terpene	853,021	877,388	carotenoid	0.33
Region 5.1	terpene	21,401	46,225	carotenoid	0.33
Region 5.2	lassopeptide	161,384	184,705	lipopolysaccharide	8

## Sheet: Table S18
Strain_Phylum	Nb_seq	Total_size (bp)	> 2Mb
C883__Armatimonadetes	4	3575512	4 Mb
C883__Chloroflexi	6	5641484	6 Mb
L. boryana PMC 883.14	5	6694777	7 Mb
C883__Proteobacteria	72	6645423	7 Mb
Region	Cluster type	From	To	Automatic annotation	Similarity
C883__Armatimonadetes
Region 3.1	terpene	86,458	107,399
C883__Chloroflexi
Region 1.1	terpene	901,874	921,928
Region 1.2	other	1,107,827	1,148,516
Region 1.3	hglE-KS,T1PKS	1,303,737	1,356,127	heterocyst glycolipids	0.57
Region 1.4	terpene	1,544,356	1,565,345
Region 2.1	indole	305,205	326,479
Region 3.1	other	473,594	514,370
C883__Proteobacteria
Region 1.1	lassopeptide	295,974	318,417

## Sheet: Table S19
Strain_Phylum	Nb_seq	Total_size (bp)	> 2Mb
C884__Bacteroidetes	4	1942276	2 Mb
Calothrix sp. PMC 884.14	46	13243152	12 Mb
C884__Proteobacteria	132	11961935	13 Mb
Region	Cluster type	From	To	Automatic annotation	Similarity
C884__Bacteroidetes
Region 1.1	terpene	426,153	446,203
Region 1.2	betalactone,T3PKS	615,389	677,072
Region 1.3	terpene	805,203	830,425	carotenoid	0.42
C884__Proteobacteria
Region 1.1	terpene	389,387	410,448
Region 2.1	betalactone	202,681	225,687
Region 2.2	hserlactone,lassopeptide	299,115	329,821	gellan polysaccharide	0.07
Region 9.1	betalactone	224,667	253,201	platensimycin / platencin	0.05
Region 15.1	terpene	65,369	86,283	(2R,3S,3'S)-2-hydroxyastaxanthin	0.33
Region 20.1	NRPS-like	57,913	100,525
Region 24.1	bacteriocin	89,655	99,743
Region 24.2	bacteriocin	128,860	139,735	N-tetradecanoyl tyrosine	0.06
Region 34.1	T3PKS	69,104	110,198
Region 47.1	terpene	11,922	32,728
Region 51.1	phosphonate	7,632	48,498
Region 54.1	T1PKS	42,795	79,016
Region 77.1	terpene	1	11,589
Region 96.1	arylpolyene	3,425	26,566	xanthomonadin I	0.14
Region 104.1	terpene	1	16,316

## Sheet: Table S20
Strain_Phylum	Nb_seq	Total_size (bp)	> 2Mb
C885__Bacteroidetes	30	7094005	7 Mb
Peudo-chroococcus couteii PMC 885.14	137	5858006	5 Mb
C885__Proteobacteria	52	18208582	18 Mb
C885__Verrucomicrobia	76	4044644	4 Mb
Region	Cluster type	From	To	Automatic annotation	Similarity
C885__Bacteroidetes
Region 1.1	terpene	939,489	964,724	carotenoid	0.42
Region 1.2	betalactone	1,873,792	1,904,496	belactosin A / belactosin C	0.08
Region 1.3	bacteriocin	2,923,911	2,936,076
Region 2.1	terpene	607,832	628,671	carotenoid	0.28
Region 3.1	terpene	82,152	103,288	bacillomycin D	0.2
C885__Proteobacteria
Region 1.1	betalactone	2	25,094	fengycin	0.13
Region 1.2	betalactone	2,480,073	2,506,146	lipopolysaccharide	0.05
Region 1.3	terpene	3,203,551	3,223,720	carotenoid	1
Region 1.4	terpene	3,760,742	3,782,246
Region 2.1	terpene	593,773	613,219
Region 2.2	terpene	937,884	958,891	carotenoid	1
Region 2.3	NRPS-like,T1PKS	1,177,234	1,228,154
Region 3.1	bacteriocin	135,147	145,992
Region 3.2	hserlactone	568,025	589,985
Region 4.1	NAGGN	1,560,492	1,575,214
Region 5.1	terpene	52,141	73,166
Region 5.2	bacteriocin	1,389,174	1,400,076
Region 8.1	terpene,T1PKS,NRPS	92,078	216,175	BE-43547A1 / BE-43547A2 / BE-43547B1 / BE-43547B2 / BE-43547B3 / BE-43547C1 / BE-43547C2	0.2
Region 8.2	arylpolyene	309,552	350,742	xanthomonadin I	0.14
Region 9.1	T3PKS	96,418	137,455
Region 13.1	terpene	18,159	38,890	conglobatin	0.1
Region 14.1	bacteriocin	112,837	123,682
Region 17.1	bacteriocin	64,156	75,010
Region 22.1	T1PKS	7,683	56,706
Region 23.1	lassopeptide,betalactone	16,414	61,965
C885__Verrucomicrobia
Region 10.1	bacteriocin	80,997	91,884
Region 13.1	NRPS,T1PKS	39,524	73,831
